# Supplementary material for: Low coverage whole genome sequencing of low-grade dysplasia strongly predicts colorectal cancer risk in ulcerative colitis
Source: bioRxiv or medRxiv preprint supplement (doi:10.1101/2024.07.08.24309811), 2024-07-08
Supplement: Supplementary file [file media-1.pdf]

# Supplementary Information

**Supplementary Figure S1: Genomic alterations in non-progressor versus progressor LGD in validation cohort.** **A.** Heatmap of genome-wide copy number alteration for lesions in the validation LGD cohort, sorted by percent genome altered. **B.** Violin plots showing the number of altered genomic segments in progressor and non-progressor lesions. **C.** Genome-wide CNA frequency for non-progressor (NP, top) and progressor (P, bottom) patients. For patients with multi-region analysis the most highly altered sample per patient was included.

## A Validation data

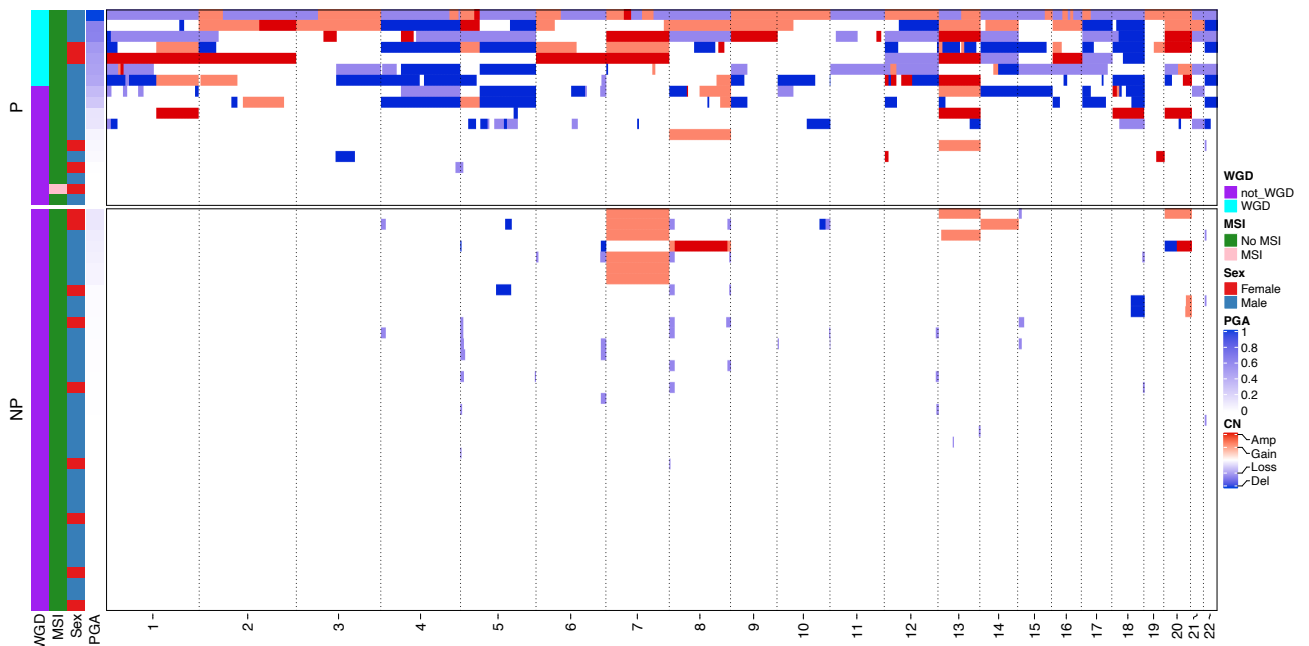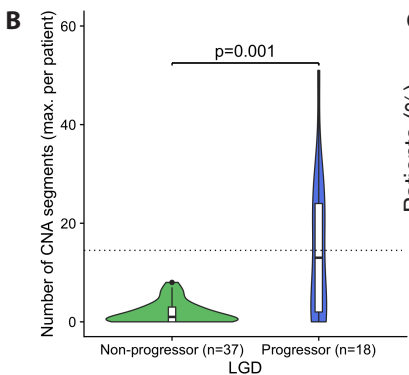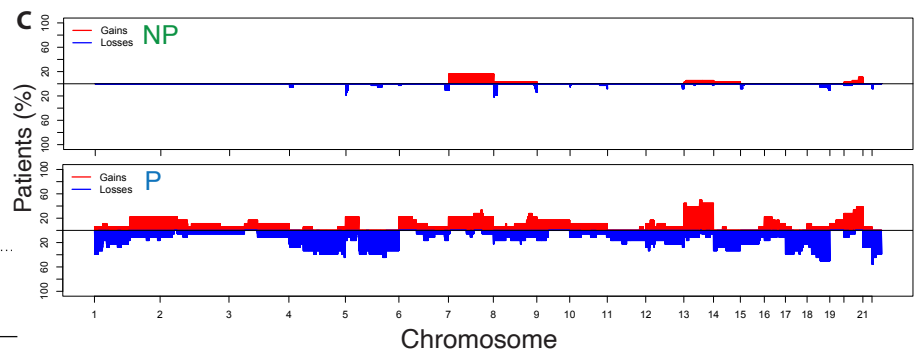

**Supplementary Figure S2: Detection of copy number altered (CNA) segments by epithelial isolation method.** Laser capture microdissection (LCM) tissue (blue) vs. Scrape tissue (pink). For LCM n = 76, for Scrape n = 46. By Mann-Whitney U tests for strategies of P vs P and NP vs NP groups, the only statistically significant difference here was LCM NP (median 3.5 CNA segments) vs Scrape NP groups (median 1 CNA segment) with  $p=2.9e-5$ .

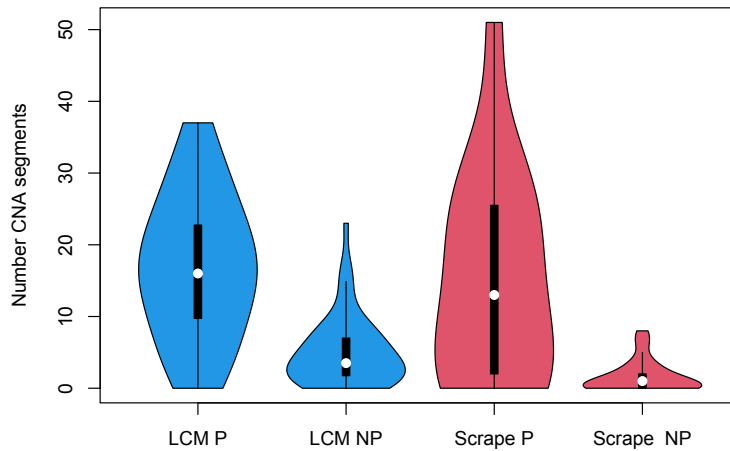

**Supplementary Figure S3: Predictive accuracy of genomic biomarker using a randomly selected sample from each patient.** Re-calculation of PPV and NPV of genomic CNA score biomarker when a random sample for each patient in the validation cohort is used for prediction. 95% confidence intervals are shown for each predicted time point (1000 simulations of random sample selection). PPV= positive predictive value. NPV = negative predictive value.

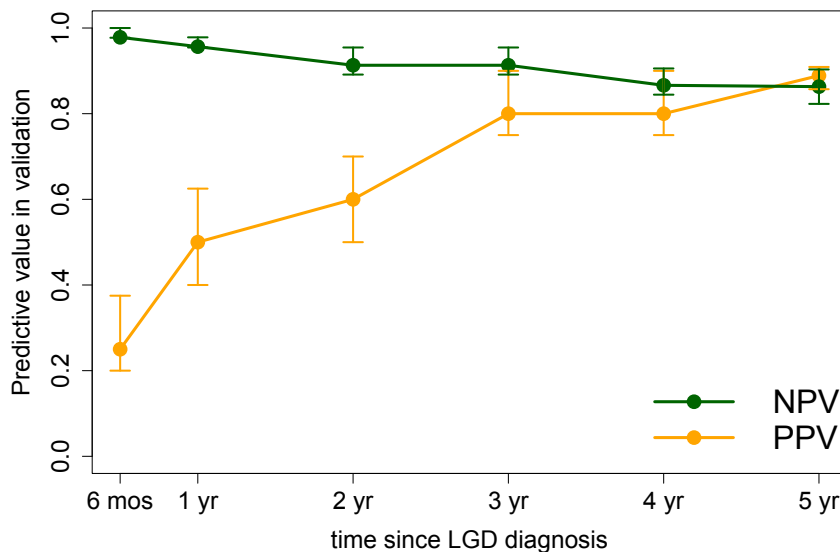

**Supplementary Table S1: Top chromosome arm level differences in max frequency of changes across samples in progressor vs non-progressor patients.** \*Adjusted p-values provided for Fisher's exact test with Benjamini-Hochberg multiple hypothesis testing correction applied.

| <b>Chromosomal arm with CNA</b> | <b>Max frequency in progressors (n = 22)</b> | <b>Max frequency of non-progressors (n = 45)</b> | <b>Odds ratio</b> | <b>Adjusted Fisher's exact test p-value*</b> |
|---------------------------------|----------------------------------------------|--------------------------------------------------|-------------------|----------------------------------------------|
| <b>Loss on 4q</b>               | 0.45                                         | 0.07                                             | 11.14             | 0.008                                        |
| <b>Gain on 5p</b>               | 0.36                                         | 0.04                                             | 11.74             | 0.012                                        |
| <b>Loss on 5q</b>               | 0.64                                         | 0.16                                             | 9.09              | 0.004                                        |
| <b>Gain on 7p</b>               | 0.59                                         | 0.18                                             | 6.45              | 0.012                                        |
| <b>Gain on 8q</b>               | 0.55                                         | 0.13                                             | 7.50              | 0.011                                        |
| <b>Loss on 11p</b>              | 0.27                                         | 0                                                | Inf               | 0.011                                        |
| <b>Loss on 11q</b>              | 0.32                                         | 0.02                                             | 19.51             | 0.012                                        |
| <b>Loss on 17p</b>              | 0.59                                         | 0.07                                             | 18.96             | <0.001                                       |
| <b>Loss on 17q</b>              | 0.5                                          | 0.02                                             | 40.96             | <0.001                                       |
| <b>Loss on 18q</b>              | 0.45                                         | 0.09                                             | 8.21              | 0.012                                        |
